1 **Maternal and child outcomes reported by breastfeeding women following mRNA COVID-**  
2 **19 vaccination**

3 Kerri Bertrand<sup>1</sup>, Gordon Honerkamp-Smith<sup>1</sup> and Christina Chambers<sup>1,2</sup>

4 **Affiliations:** Department of Pediatrics<sup>1</sup>, and Herbert Wertheim School of Public Health and  
5 Longevity Science<sup>2</sup>, University of California, San Diego, La Jolla, CA 92093

6 **Short Title:** Breastfeeding outcomes after COVID-19 vaccination

7 **Address Correspondences to:**

8 Kerri Bertrand  
9 Department of Pediatrics  
10 University of California, San Diego  
11 9500 Gilman Drive, #0828, La Jolla, CA 92093  
12 Telephone 858 246 1713  
13 Email: [kdutcher@health.ucsd.edu](mailto:kdutcher@health.ucsd.edu)  
14

15 **Conflict of Interest Disclosures**

16 Dr. Chambers receives research funding from the following industry sponsors and a  
17 foundation: Amgen Inc.; AstraZeneca; Celgene; GlaxoSmithKline; Janssen Pharmaceuticals;  
18 Pfizer, Inc.; Regeneron; Hoffman La-Roche-Genentech; Genzyme Sanofi-Aventis; Takeda  
19 Pharmaceutical Company Limited; Sanofi; UCB Pharma, USA; Sun Pharma Global FZE;  
20 Gilead; and the Gerber Foundation.  
21

22 **Funding/Support**

23 Funding for this study was in part provided by a supplement to NIH-NICHD R21 Grant Number  
24 1R21HD104412-01 to Christina Chambers  
25  
26

27 **Table of Contents Summary**

28 **What's known on this subject:**

29

30 One published U.S. study with 31 breastfeeding women who were vaccinated with either of the  
31 two available mRNA COVID-19 vaccines found that 67% experienced any side effects after  
32 dose one and 61% after dose two of the vaccine.

33 **What this study adds:**

34 More than 85% of 180 breastfeeding women who received an mRNA COVID-19 vaccine  
35 reported local or systemic symptoms, with higher frequency following the second dose. Few  
36 symptoms were reported in their breastfed children. No serious adverse events were noted.

37 **Contributors' Statement Page**

38

39 Dr. Chambers and Ms. Bertrand designed the study and supervised the collection of data used in  
40 the study. Mr. Honerkamp-Smith performed the statistical analysis. All authors were involved in  
41 preparing the manuscript. All authors approved the final manuscript as submitted and agree to  
42 be accountable for all aspects of the work.

43

44 **Acknowledgements**

45

46 The authors wish to thank student researchers Angelique Ghadishah, Bianca Kermani, Samantha  
47 Powell, and Zoe Sidiropoulos for helping with data collection. We also wish to express our  
48 appreciation to the women who participated in this study for giving so generously of their time  
49 and effort to provide clinical information.

## 50 INTRODUCTION

51 Clinical trials for the both the Pfizer-BioNTech BNT162b2 and Moderna mRNA-1273  
52 COVID-19 vaccines demonstrated ability to prevent infection and severe disease, leading to  
53 emergency use authorization by the U.S. Food and Drug Administration.<sup>1, 2</sup>

54 The American College of Obstetrics and Gynecology and The Society for Maternal Fetal  
55 Medicine have recommended that these mRNA vaccines be made available for lactating women.  
56 However, initial trials excluded breastfeeding women, leading to questions about their safety.<sup>3</sup>  
57 One study of 31 breastfeeding women who received an mRNA vaccine found that >60%  
58 reported side effects.<sup>4</sup> We sought to evaluate a larger sample of vaccinated breastfeeding women  
59 and their breastfed children.

## 60 MATERIALS AND METHODS

61 Breastfeeding women in the U.S. who received an mRNA vaccine were enrolled into the  
62 Mommy's Milk Human Milk Research Biorepository at the University of California, San Diego.  
63 Demographics, health history, vaccine brand, and maternal symptoms and child events were  
64 collected by maternal interview and questionnaire for seven days following each dose. The  
65 study was approved by the UC San Diego IRB; written consent was obtained from participants.

66 Maternal and child characteristics and outcomes were compared by brand for each dose  
67 using Student's t-test for continuous and Fisher's exact test for categorical variables. Missing  
68 values were excluded. R version 25 4.0.3 was used for analyses.

## 69 Results

70 Between December 14, 2020 and February 1, 2021, 180 women who received either  
71 mRNA vaccine were enrolled. As shown in Table 1, 128 women (71.1%) received the Pfizer  
72 vaccine and 52 (28.9%) received the Moderna brand. Child age at enrollment averaged 7.47

73 months (SD 5.44, Range 0.09 to 27.45 months). The majority (86.0%) were exclusively  
74 breastfed.

75       Following dose one, similar proportions of women reported any vaccine symptom by  
76 brand (89.4% Pfizer; 98.1% Moderna); frequency by specific symptom did not differ by brand.  
77 However, following dose two, women who received the Moderna brand were significantly more  
78 likely to report systemic side effects including chills, muscle/body aches, fever, vomiting. They  
79 were also more likely to report localized symptoms including pain, redness, swelling or itching  
80 at the injection site than women following dose two of the Pfizer brand (all p's <0.05). A small  
81 proportion of women following dose one of either vaccine reported a reduction in milk supply.  
82 There was a significant difference in reduction of milk supply following dose two by brand  
83 (8.0% vs. 23.4% for Pfizer and Moderna, respectively, p<0.05). However, in all cases milk  
84 production returned to normal within 72 hours. Three women reported a change in color of milk  
85 (blue-green) following dose one; two reported change in color of milk following dose two (Table  
86 2).

87       Few events were reported for children following maternal vaccination with either brand  
88 or either dose. The most common child events following dose two were irritability (10.3% and  
89 10.4% for Pfizer and Moderna, respectively), poor sleep (7.8% and 8.3% for Pfizer and  
90 Moderna respectively), with significantly more drowsiness reported for children whose mothers  
91 received Moderna vs. Pfizer (0% vs. 6.4%, p=0.02) (Table 2).

## 92 **Discussion**

93           We found >85% of participants reported any symptoms for both the Pfizer-BioNTech and  
94 Moderna vaccines following either dose. This is substantially higher than the 61-67% of women  
95 who reported any symptom in the Gray et al. paper.<sup>4</sup> This could be due to differences in methods  
96 of assessment, timing, and number of symptoms specifically queried. However, consistent with  
97 adult participants in clinical trials for each vaccine, we noted increased frequencies of most  
98 symptoms following the second dose compared to the first.<sup>5,6</sup> We also found significantly greater  
99 frequencies of localized pain, redness, swelling and itching at the injection site as well as  
100 systemic symptoms including chills, muscle/body aches, fever and vomiting following dose two  
101 of the Moderna brand vs. Pfizer. Some participants reported a reduction in milk supply, which in  
102 all cases returned to normal. We found low frequencies of any events reported in children, all of  
103 which were non-serious. To our knowledge there have been no previous studies published on  
104 outcomes in breastfed children.

105           These data are reassuring regarding the safety of vaccination in breastfeeding women and  
106 their breastfed children with either of the mRNA COVID-19 vaccines. Additional studies are  
107 underway to evaluate milk composition and antibody status in samples obtained from women  
108 participating in the current study.

## References

1. FDA authorizes Pfizer-BioNTech COVID-19 vaccine. *Med Lett Drugs Ther.* Jan 11 2021;63(1615):1-2.
2. FDA authorizes Moderna COVID-19 vaccine. *Med Lett Drugs Ther.* Jan 25 2021;63(1616):9-10.
3. Adhikari EH, Spong CY. COVID-19 Vaccination in Pregnant and Lactating Women. *JAMA.* Mar 16 2021;325(11):1039-1040. doi:10.1001/jama.2021.1658
4. Gray KJ, Bordt EA, Atyeo C, et al. COVID-19 vaccine response in pregnant and lactating women: a cohort study. *Am J Obstet Gynecol.* Mar 24 2021;doi:10.1016/j.ajog.2021.03.023
5. National Center for Immunization and Respiratory Diseases. Local Reactions, Systemic Reactions, Adverse Events, and Serious Adverse Events: Pfizer-BioNTech COVID-19 Vaccine. Updated 12/13/2020. Accessed 04/16, 2021. <https://www.cdc.gov/vaccines/covid-19/info-by-product/pfizer/reactogenicity.html>
6. National Center for Immunization and Respiratory Diseases. Local Reactions, Systemic Reactions, Adverse Events, and Serious Adverse Events: Moderna COVID-19 Vaccine. Accessed 04/16, 2021. <https://www.cdc.gov/vaccines/covid-19/info-by-product/moderna/reactogenicity.html>

**Table 1: Characteristics of breastfeeding women who received either mRNA COVID-19 vaccine and their breastfed children, N=180**

|                                        | <b>Pfizer/BioNTech<br/>n=128</b> | <b>Moderna<br/>n= 52</b> | <b>All<br/>N= 180</b>     |
|----------------------------------------|----------------------------------|--------------------------|---------------------------|
| <b>Maternal Age (years)</b>            | 34.92 (3.67)                     | 34.50 (3.24)             | 34.80 (3.54)              |
| <b>Race</b>                            |                                  |                          |                           |
| White                                  | 119 (93.7)                       | 39 (75.0)                | 159 (88.3)**              |
| Black                                  | 0 (0.0)                          | 1 (1.9)                  | 1 (0.6)                   |
| Asian                                  | 7 (5.5)                          | 12 (23.1)                | 19 (10.6)                 |
| Native American/ Alaska Native         | 1 (0.8)                          | 0 (0.0)                  | 1 (0.6)                   |
| <b>Ethnicity</b>                       |                                  |                          |                           |
| Non-Hispanic                           | 123 (96.9)                       | 51 (98.1)                | 174 (96.7)                |
| Hispanic                               | 4 (3.1)                          | 1 (1.9)                  | 6 (3.3)                   |
| <b>Education</b>                       |                                  |                          |                           |
| Some College                           | 1 (0.8)                          | 0 (0.0)                  | 1 (0.6)                   |
| College Graduate                       | 33 (26.2)                        | 12 (23.5)                | 45 (25.3)                 |
| Post-Graduate                          | 92 (73.0)                        | 39 (76.5)                | 132 (74.2)                |
| <b>Income per year</b>                 |                                  |                          |                           |
| \$10,001-\$49,999                      | 0 (0.0)                          | 1 (2.0)                  | 1 (0.6)                   |
| >\$60,000                              | 127 (100.0)                      | 50 (98.0)                | 178 (99.4)                |
| <b>Full Time Employment</b>            | 89 (71.8)                        | 34 (66.7)                | 124 (70.5)                |
| <b>Maternal Co-Morbidities</b>         |                                  |                          |                           |
| BMI >30                                | 16 (12.6)                        | 4 (7.8)                  | 20 (11.2)                 |
| Hypertension                           | 2 (1.6)                          | 0 (0.0)                  | 2 (1.1)                   |
| Diabetes                               | 0 (0.0)                          | 0 (0.0)                  | 0 (0.0)                   |
| Asthma                                 | 20 (15.7)                        | 6 (11.5)                 | 26 (14.4)                 |
| <b>Prior COVID-19 infection</b>        | 4 (3.1)                          | 4 (7.7)                  | 8 (4.4)                   |
| <b>Child Age in months (SD, Range)</b> | 7.60 (5.54, 0.39-27.45)          | 7.16 (5.26, 0.10-23.45)  | 7.47 (5.44, 0.09 - 27.45) |
| <b>Child Sex</b>                       |                                  |                          |                           |
| Female                                 | 75 (59.5)                        | 25 (49.0)                | 100 (56.7)                |
| Male                                   | 51 (40.5)                        | 26 (51.0)                | 77 (43.3)                 |
| <b>Pre-term Delivery</b>               | 5 (3.9)                          | 4 (7.7)                  | 9 (5.0)                   |
| <b>Exclusive Breastfeeding</b>         | 107 (84.3)                       | 45 (90.0)                | 153 (86.0)                |

\*p<0.05 \*\*p<0.005. Continuous variables were summarized by mean (SD) and group comparisons were made using a t-test. Categorical variables were summarized by count (%) and group comparisons were made using Fisher's Exact test.

**Table 2. Symptoms reported by breastfeeding women who received either mRNA COVID-19 vaccine and events in their breastfed children**

| Symptom                      | Within 7 days of Dose 1 |                    |                |                  | Within 7 days of Dose 2 |                    |               |                  |
|------------------------------|-------------------------|--------------------|----------------|------------------|-------------------------|--------------------|---------------|------------------|
|                              | Pfizer-BioNTech         |                    | Moderna        |                  | Pfizer-BioNTech         |                    | Moderna       |                  |
|                              | Women<br>n= 126         | Children<br>n= 129 | Women<br>n= 52 | Children<br>n=53 | Women<br>n=123          | Children<br>n= 126 | Women<br>n=52 | Children<br>n=53 |
| <i>Any Maternal Symptoms</i> | 110 (89.4)              |                    | 51 (98.1)      |                  | 114 (98.3)              |                    | 50 (100.0)    |                  |
| <i>Any Local Symptoms</i>    | 105 (86.8)              |                    | 50 (96.2)      |                  | 102 (87.9)              |                    | 48 (98.0)*    |                  |
| Pain at Injection Site       | 105 (86.8)              |                    | 50 (96.2)      |                  | 102 (87.9)              |                    | 48 (98.0)     |                  |
| Redness at Injection Site    | 7 (5.9)                 |                    | 5 (9.6)        |                  | 3 (2.6)                 |                    | 15 (31.9)**   |                  |
| Swelling at Injection Site   | 7 (5.9)                 |                    | 6 (11.5)       |                  | 7 (6.1)                 |                    | 14 (29.8)**   |                  |
| Itching at Injection Site    | 3 (3.5)                 |                    | 4 (7.7)        |                  | 5 (4.4)                 |                    | 8 (17.4)*     |                  |
| <i>Any Systemic Symptoms</i> | 51 (41.5)               |                    | 28 (53.8)      |                  | 101 (87.1)              |                    | 48 (96.0)*    |                  |
| Chills                       | 8 (6.8)                 |                    | 5 (9.6)        |                  | 55 (47.8)               |                    | 36 (75.0)**   |                  |
| Headache                     | 28 (23.7)               |                    | 13 (25.0)      |                  | 74 (64.3)               |                    | 35 (71.4)     |                  |
| Joint Pain                   | 7 (5.9)                 |                    | 1 (1.9)        |                  | 31 (27.2)               |                    | 16 (34.0)     |                  |
| Muscle/Body Aches            | 16 (13.6)               |                    | 6 (11.5)       |                  | 71 (61.7)               |                    | 41 (83.7)*    |                  |
| Fatigue or Tiredness         | 31 (26.3)               |                    | 12 (23.1)      |                  | 82 (71.3)               |                    | 42 (84.0)     |                  |
| Fever                        | 1 (0.8)                 |                    | 2 (3.8)        |                  | 28 (24.3)               |                    | 23 (46.9)*    |                  |
| Nausea                       | 5 (4.2)                 |                    | 1 (1.9)        |                  | 18 (15.7)               |                    | 13 (27.7)     |                  |
| Vomiting                     | 0 (0.0)                 |                    | 0 (0.0)        |                  | 1 (0.9)                 |                    | 4 (8.5)*      |                  |
| Diarrhea                     | 2 (1.7)                 |                    | 0 (0.0)        |                  | 3 (2.6)                 |                    | 3 (6.4)       |                  |
| Abdominal Pain               | 1 (0.8)                 |                    | 0 (0.0)        |                  | 4 (3.4)                 |                    | 3 (6.4)       |                  |
| Rash (body)                  | 1 (0.8)                 |                    | 1 (1.9)        |                  | 1 (0.9)                 |                    | 1 (2.1)       |                  |
| Other                        | 7 (5.9)                 |                    | 3 (5.8)        |                  | 7 (6.3)                 |                    | 3 (6.8)       |                  |
| <i>Change in Milk Supply</i> |                         |                    |                |                  |                         |                    |               |                  |
| More Milk                    | 4 (3.3)                 |                    | 0 (0.0)        |                  | 4 (3.6)                 |                    | 3 (6.4)       |                  |
| Less Milk                    | 9 (7.3)                 |                    | 6 (11.5)       |                  | 9 (8.0)                 |                    | 11 (23.4)*    |                  |
| Change in Milk Color         | 2 (8.0)                 |                    | 1 (7.1)        |                  | 1 (4.0)                 |                    | 1 (6.2)       |                  |
| <b><i>Child Events</i></b>   |                         |                    |                |                  |                         |                    |               |                  |
| Drowsiness                   |                         | 0 (0.0)            |                | 1 (2.0)          |                         | 0 (0.0)            |               | 3 (6.4)*         |
| Sedation                     |                         | 0 (0.0)            |                | 0 (0.0)          |                         | 0 (0.0)            |               | 0 (0.0)          |
| Poor feeding                 |                         | 0 (0.0)            |                | 0 (0.0)          |                         | 0 (0.0)            |               | 1 (2.1)          |
| Rash                         |                         | 1 (0.8)            |                | 0 (0.0)          |                         | 1 (0.9)            |               | 1 (2.1)          |
| Bruising/bleeding            |                         | 0 (0.0)            |                | 0 (0.0)          |                         | 0 (0.0)            |               | 0 (0.0)          |
| Constipation                 |                         | 0 (0.0)            |                | 1 (2.0)          |                         | 1 (0.9)            |               | 1 (2.1)          |
| Diarrhea                     |                         | 1 (0.8)            |                | 2 (3.9)          |                         | 3 (2.6)            |               | 1 (2.1)          |
| Stools w/ abnormal color     |                         | 1 (0.8)            |                | 2 (3.9)          |                         | 2 (1.7)            |               | 2 (4.2)          |
| Fever                        |                         | 2 (1.7)            |                | 0 (0.0)          |                         | 2 (1.7)            |               | 0 (0.0)          |
| Low Body Temp                |                         | 0 (0.0)            |                | 0 (0.0)          |                         | 0 (0.0)            |               | 0 (0.0)          |
| Restlessness                 |                         | 1 (0.8)            |                | 0 (0.0)          |                         | 4 (3.4)            |               | 2 (4.2)          |
| Irritability                 |                         | 2 (1.7)            |                | 2 (3.9)          |                         | 12 (10.3)          |               | 5 (10.4)         |
| Poor sleep                   |                         | 4 (3.4)            |                | 3 (5.9)          |                         | 9 (7.8)            |               | 4 (8.3)          |
| High-pitched crying          |                         | 0 (0.0)            |                | 0 (0.0)          |                         | 0 (0.0)            |               | 0 (0.0)          |
| Abnormal movements           |                         | 0 (0.0)            |                | 0 (0.0)          |                         | 0 (0.0)            |               | 0 (0.0)          |
| Abnormal skin color          |                         | 1 (0.8)            |                | 0 (0.0)          |                         | 0 (0.0)            |               | 0 (0.0)          |

\*p<0.05 \*\*p<0.005. Variables were summarized by count (%) and group comparisons were made using Fisher's Exact test.
